# Supplementary material
Source: publisher figshare collection journal article supplement (https://geolsoc.figshare.com/ndownloader/files/5423981)
Supplement: Supplementary file 1 [file 5423981]

Table 5 U-Pb (SIMS) data for Iona Group detrital titanite (C59),,,,,,,,,,,,,,,,,,,,
Spot,,206Pb,f206%,238U,±2s,207Pb,±2s,%disc,207Pb,±2s,207Pb,±2s,206Pb,±2s,Conc. ,±2s,,,,
#,Description,204Pb,,206Pb,%,206Pb,%,,206Pb,,235U,,238U,,age ,,,,,
1,"b, uz, 195, 140",238,7.86,3.851,7.36,0.090,16.31,4.81,1427,296,1463,144,1488,98,1482,93,,,,
15,"b, uz, 210, 120",2903,0.64,3.490,7.18,0.098,3.57,3.28,1579,66,1605,66,1624,103,1592,56,,,,
11,"b, uz, 135, 105",10038,0.19,3.595,7.10,0.099,2.76,-1.31,1601,51,1590,62,1582,100,1597,46,,,,
17,"b, uz, 190, 100",798,2.34,3.225,7.08,0.101,7.04,6.41,1648,128,1699,84,1741,109,1702,82,,,,
10a,"b, uz, 230, 175",782,2.39,3.364,7.27,0.110,7.91,-8.08,1806,140,1736,91,1678,108,1721,88,,,,
06a,"b, uz, 210, 150",1780,1.05,3.328,7.13,0.107,3.08,-3.26,1744,56,1716,65,1694,107,1733,49,,,,
03a,"b, hz, 200, 160",1674,1.12,3.260,7.08,0.107,4.33,-1.64,1750,78,1736,70,1725,108,1741,64,,,,
18,"b, uz, 162, 120",1455,1.29,3.117,7.06,0.105,4.44,5.44,1712,81,1756,71,1794,111,1741,66,,,,
9,"b, uz, 175, 120",155,12.04,3.268,7.14,0.116,12.29,-10.88,1903,213,1805,124,1721,108,1750,100,,,,
8,"b, uz, 225, 140",792,2.36,3.207,7.13,0.109,5.03,-1.85,1778,90,1763,74,1749,110,1766,70,,,,
21,"b, uz, 135, 90",1939,0.96,2.983,8.80,0.108,0.86,6.30,1767,16,1818,76,1864,143,1768,16,,,,
13,"b, uz, 210, 105",3890,0.48,3.242,7.15,0.109,3.46,-3.08,1781,63,1755,67,1733,109,1769,54,,,,
2,"b, uz, 155, 110",1532,1.22,3.197,7.18,0.109,3.66,-1.61,1780,66,1766,69,1755,111,1773,57,,,,
4,"b, uz, 150, 110",1156,1.62,3.397,7.08,0.111,3.24,-9.54,1816,58,1732,66,1664,104,1781,830,,,,
12,"b, uz, 160, 135",3675,0.51,3.123,7.10,0.110,2.30,-0.14,1793,42,1792,64,1791,111,1793,39,,,,
20,"b, uz, 150, 135",2643,0.71,3.096,8.78,0.110,0.82,0.58,1795,15,1800,76,1804,139,1795,15,,,,
19,"b, uz, 220, 160",1701,1.10,2.994,8.78,0.110,1.48,3.53,1803,27,1832,77,1858,142,1805,27,,,,
14a,"b, uz, 145, 110",1922,0.97,3.092,7.14,0.111,4.62,-0.36,1812,83,1809,73,1807,113,1810,67,,,,
5,"b, uz, 190, 100",1517,1.23,3.217,7.10,0.112,3.91,-5.87,1839,70,1788,69,1745,109,1812,59,,,,
7,"b, uz, 165, 140",3374,0.55,3.182,7.11,0.112,3.14,-4.38,1832,56,1794,66,1762,110,1818,50,,,,
16,"b, uz, 135, 93",1709,1.09,3.139,7.52,0.116,7.17,-6.97,1898,126,1837,90,1783,118,1833,88,,,,
,,,,,,,,,,,,,,,,,,,,
,,,,,,,,,,,,,,,,,,,,
,,,,,,,,,,,,,,,,,,,,
"Data sorted in order of increasing Concordia age. Concordia age errors are 2 sigma apart from those > 100 Ma which are 95% confidence. f206% is the percentage of common 206Pb, estimated from measured 204Pb. A common Pb correction has been applied to the data using the present-day terrestrial common Pb estimate of Stacey & Kramers (1975). % disc, % discordance, positive numbers are reverse discordant. Data in italics where 207Pb/206Pb ages are used instead of Concordia ages in titanite age distribution plot. Explanation for description: b = brown, uz = unzoned, hz = hint of zoning; numers are length and width in microns, respectively. ",,,,,,,,,,,,,,,,,,,,
,,,,,,,,,,,,,,,,,,,,
,,,,,,,,,,,,,,,,,,,,
,,,,,,,,,,,,,,,,,,,,
,,,,,,,,,,,,,,,,,,,,
,,,,,,,,,,,,,,,,,,,,
,,,,,,,,,,,,,,,,,,,,
,,,,,,,,,,,,,,,,,,,,
,,,,,,,,,,,,,,,,,,,,
,,,,,,,,,,,,,,,,,,,,
